# Supplementary material for: Immobilization of TiO2 nanoparticles onto paper modification through bioconjugation
Source: Royal Society of Chemistry journal article supplement (doi:10.1039/b818410k), 2009-01-01
Supplement: b818410k.pdf [file b818410k.pdf]

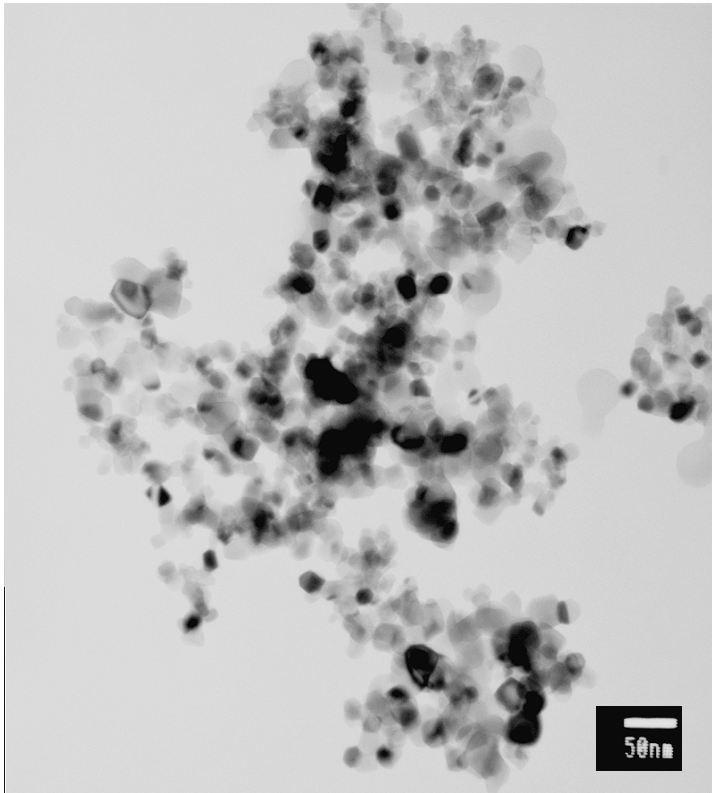

**Figure 1S** TEM image of RB5 supernatant solution, after 12 hours of UV-TiO<sub>2</sub>-paper irradiation (365nm, 23W m<sup>-2</sup>).
